# Supplementary material for: Mortality and Antibiotic Timing in Deep Learning-Derived Surviving Sepsis Campaign Risk Groups: A Multicenter Study
Source: Research Square preprint supplement (doi:10.21203/rs.3.rs-6123541/v1), 2025-04-01
Supplement: Supplementary file 1 [file cbd52963a5e7e3689c933f65.docx]

**SUPPLEMENT:**

Data Missingness

We used preprocessing codes to compute the percent missingness for all features (7 vital signs, and 43 laboratory results). Missing data were imputed using either time-limited carry forward or mean imputation. We excluded patients who did not have at least one vital sign documented in the previous 6 hours prior to algorithm. We also excluded patients who did not have at least one laboratory value recorded in the previous 24 hours prior to algorithm prediction.

We report the missingness for each clinical feature, by study site, in Supplemental Tables 1 and 2.

**Supplemental Table 1:** Vital Sign Missingness (%)

| Vital | Development Site | Validation Site |
| --- | --- | --- |
| HR | 0.1 | 0.1 |
| O2Sat | 0.6 | 0.5 |
| Temp | 16.3 | 16.2 |
| SBP | 0.1 | 0.2 |
| MAP | 20.1 | 15.4 |
| DBP | 0.1 | 0.2 |
| Resp | 1.5 | 2.1 |

**Supplemental Table 2:** Lab Missingness (%)

| Lab Missingness | Development Site | Validation Site |
| --- | --- | --- |
| EtCO2 | 92.5 | 93.8 |
| BaseExcess | 96.7 | 67.4 |
| HCO3 | 10.5 | 100 |
| FiO2 | 97.5 | 78.4 |
| pH | 96.7 | 96.2 |
| PaCO2 | 96.8 | 96.4 |
| SaO2 | 96.9 | 67.8 |
| AST | 18 | 17.9 |
| BUN | 10.6 | 6.9 |
| Alkalinephos | 17.9 | 16.1 |
| Calcium | 10.5 | 3.8 |
| Chloride | 10.5 | 6.9 |
| Creatinine | 10.6 | 7.1 |
| BilirubinDirect | 96.1 | 96.4 |
| Glucose | 10.7 | 7.1 |
| Lactate | 37.8 | 37.2 |
| Magnesium | 65.8 | 57 |
| Phosphate | 77.3 | 67.4 |
| Potassium | 10.5 | 8.7 |
| BilirubinTotal | 19.8 | 16.1 |
| TroponinI | 80.4 | 100 |
| Hct | 11.7 | 10.5 |
| Hgb | 11 | 10.5 |
| PTT | 72.8 | 46.9 |
| WBC | 11.7 | 10.6 |
| Fibrinogen | 99.4 | 99.3 |
| Platelets | 12 | 11 |
| PaO2 | 96.7 | 96.2 |
| BNP | 82.7 | 100 |
| Sodium | 11.3 | 11.7 |
| Procalcitonin | 89 | 98.8 |
| CRP | 100 | 94 |
| Ammonia | 95.6 | 91.2 |
| Hgb_A1C | 99.6 | 99.5 |
| lymphocytes | 14.3 | 100 |
| lymphocytes_differential | 12 | 33.3 |
| albumin | 18.5 | 22 |
| ALT | 19.1 | 18.2 |
| D_Dimer | 96.4 | 99.7 |
| Ferritin | 99.9 | 99 |
| Red_cell_width | 11.8 | 10.5 |
| Sedimentation_Rate | 94.1 | 95.1 |
| LDH | 98.2 | 98.8 |

**Supplemental Table 3: Other Variables Used in COMPSER and SHOCK-NET**

Here we list the non-clinical variables used in our DL models (in addition to those in Supplemental Tables 1 and 2).

| Non-Clinical Features | | |
| --- | --- | --- |
| age | RESPSOFA | on_anticonvulsants |
| gender | coaSOFA | on_antipsychotics |
| MICU | liverSOFA | on_bleed_reversal |
| SICU | CVSSOFA | on_vasodilator |
| preLOS | perfusionSOFA | on_antihypertensive |
| ICULOS | renalSOFA | on_antiarrhythmic |
| TempSIRS | CMSsofa | on_prostacyclin |
| RESPSIRS | on_vent | on_neuro_block |
| HRSIRS | on_anesthesia | on_pain_med |
| WBCSIRS | on_anticoagulants | on_steroids |

**Supplemental Table 4:** ICD Code Variables in COMPOSER and Shock-Net

| ICD Features | | |
| --- | --- | --- |
| has_intravascular_coagulation | has_cerebral_infarction | has_hiv |
| has_necrotizing_fasciitis | has_meningitis | has_hypertension |
| has_tumor_lysis_syndrome | has_malignant_liver_cancer | has_obesity |
| has_shock | has_gi_hemorrhage | has_brain_condition |
| has_metastatic_cancer | has_acute_renal_failure | has_pulmonary_condition |
| has_stemi | has_chronic_liver_disease | has_valve_disease |
| has_myeloblastic_leukemia | has_neutropenia | has_uti |
| has_liver_failure | has_cardiac_arrythmia | has_anemia |
| has_malignant_pleural_effusion | has_malnutrition | has_pneumonia |
| has_pneumothorax | has_pulmonary_heart_disease | has_hyperlipidemia |
| has_cachexia | has_ckd | has_depression |
| has_coma | has_plasma_protein_disorder | has_bacteremia |
| has_peritonitis | has_aplasia | has_reflux_disease |
| has_lymphoma | has_aspiration_pneumonitis | has_hypothyroidism |
| has_carditis | has_ami | has_insulin |
| has_septic_empolism | has_chf | Liver cirrhosis |
| has_coagulation_defect | has_encephalopathy | Immune conditions |
| has_primary_lung_cancer | has_thrombocytopenia | Solid malignancy |
| has_lymphoid_leukemia | has_coronary_artery_disease | Organ transplant |
| has_pulmonary_embolism | has_copd | Rheumatologic/  Inflammatory |
| has_pericardial_effusion | has_diabetes |  |

DL Model Performance

To evaluate the performance of Shock-Net and COMPOSER we display the confusion matrix for patient stratification at both the development site and the validation site. These show how our predictive models differed from the clinical labels we use as the ground truth to train and test our models against.

We consider the clinical ground truth labels the ’true’ labels and the output of our DL models as ‘predicted’ labels, and we tabulate how many patients there are with each label combination. We perform this analysis for the development site (Supplementary Figure 1) and validation site (Supplementary Figure 2) for all patients and excluding patients who develop shock within 3 hours of ED triage (Supplementary Figures 3 & 4 ).

**Supplemental Figure 1.** Confusion matrix for the development site patients analyzed by our DL models. Each cell in the matrix displays the total number of patients with a given combination of true and predicted labels (top) and the corresponding percentage of patients within each true label category (bottom).

**Supplemental Figure 2.** Confusion matrix for the validation site patients analyzed by our DL models. Each cell in the matrix displays the total number of patients with a given combination of true and predicted labels (top) and the corresponding percentage of patients within each true label category (bottom).

**Supplemental Figure 3:** Confusion Matrix for the development site patients analyzed by our DL models, excluding patients who develop shock within 3 hours of ED triage. Each cell in the matrix displays the total number of patients with a given combination of true and predicted labels (top) and the corresponding percentage of patients within each true label category (bottom).

**Supplemental Figure 4:** Confusion Matrix for the validation site patients analyzed by our DL models, excluding patients who develop shock within 3 hours of ED triage. Each cell in the matrix displays the total number of patients with a given combination of true and predicted labels (top) and the corresponding percentage of patients within each true label category (bottom).

Detailed Antibiotic Timing Data For All Patients

**Supplemental Table 5:** Development Antibiotic Timing Among Patients Treated with Suspected Sepsis Infection Between Jan 2016 and Dec 2023.

| **Variables** | **Group 1**  **Shock Likely to Develop and Sepsis Probable**  **(n=3651)** | **Group 2**  **Shock Likely to Develop and Sepsis Possible**  **(n=124)** | **Group 3**  **Shock Unlikely to Develop and Sepsis Probable**  **(n=14774)** | **Group 4**  **Shock Unlikely to Develop and Sepsis Possible**  **(n=11241)** |
| --- | --- | --- | --- | --- |
| **Antibiotic Timing** | | | | |
| Received Abx, Anytime % (n) | 95.5 (3488/3651) | 89.5 (111/124) | 87.4 (12917/14774) | 75.7 (8513/11241) |
| Time to Abx from triage [IQR] a | 1.7 [1.0 - 3.1] | 3.0 [1.7 - 6.2] | 2.8 [1.5 - 5.1] | 4.6 [2.7 - 8.0] |
| Time to Abx from T0 [IQR] *a,b* | 1.0 [0.5 - 2.0] | 1.8 [0.7 - 4.2] | 1.1 [0.6 - 2.5] | 1.0 [0.5 - 2.8] |
| Received Abx <1 hr triage, % (n) | 25.6 (935/3651) | 8.1 (10/124) | 12.4 (1834/14774) | 3.5 (398/11241) |
| Received Abx 1-3 hrs triage, % (n) | 45.1 (1645/3651) | 35.5 (44/124) | 35.0 (5169/14774) | 18.6 (2089/11241) |
| Received Abx >3 hrs triage, % (n) | 24.9 (908/3651) | 46.0 (57/124) | 40.0 (5914/14774) | 53.6 (6026/11241) |
| Received Abx <1 hr T0, % (n) *b* | 47.3 (1728/3651) | 37.1 (46/124) | 39.4 (5815/14774) | 36.9 (4144/11241) |
| Received Abx 1-3 hrs T0, % (n) *b* | 34.4 (1256/3651) | 23.4 (29/124) | 30.5 (4509/14774) | 20.7 (2326/11241) |
| Received Abx >3 hrs T0, % (n) *b* | 13.8 (504/3651) | 29.0 (36/124) | 17.6 (2593/14774) | 18.2 (2043/11241) |

*a* Median time in hours. *b* T0 = time of clinical suspicion of potential sepsis.

**Supplemental Table 6:** Validation Site ED Stratification, Mortality, and Antibiotic Timing Among Patients Treated with Suspected Sepsis Infection Between Jan 2023 and Oct 2024.

| **Variables** | **Group 1**  **Shock Likely to Develop and Sepsis Probable**  **(n=712)** | **Group 2**  **Shock Likely to Develop and Sepsis Possible**  **(n=53)** | **Group 3**  **Shock Unlikely to Develop and Sepsis Probable**  **(n=1659)** | **Group 4**  **Shock Unlikely to Develop and Sepsis Possible**  **(n=1950)** |
| --- | --- | --- | --- | --- |
| **Antibiotic Timing** | | | | |
| Received Abx, Anytime % (n) | 94.9 (676/712) | 92.3  (48/52) | 94.0 (1559/1659) | 88.7 (1729/1950) |
| Time to Abx from triage [IQR]*a* | 1.8 [1.0 - 3.3] | 3.0 [1.4 - 6.1] | 3.6 [1.8 - 6.8] | 6.0 [3.1 - 9.4] |
| Time to Abx from T0 [IQR] *a,b* | 1.0 [0.6 - 1.9] | 0.9 [0.5 - 2.5] | 1.0 [0.5 - 2.1] | 0.9 [0.5 - 1.8] |
| Received Abx <1 hr triage, % (n) | 25.3 (180/712) | 11.5  (6/52) | 12.4 (205/1659) | 7.1 (138/1950) |
| Received Abx 1-3 hrs triage, % (n) | 42.0 (299/712) | 34.6  (18/52) | 27.8 (461/1659) | 14.4 (281/1950) |
| Received Abx >3 hrs triage, % (n) | 27.7 (197/712) | 46.2  (24/52) | 53.8 (893/1659) | 67.2 (1310/1950) |
| Received Abx <1 hr T0, % (n) *b* | 44.4 (316/712) | 48.1  (25/52) | 45.3 (752/1659) | 48.2 (939/1950) |
| Received Abx 1-3 hrs T0, % (n) *b* | 37.4 (266/712) | 25.0  (13/52) | 34.6 (574/1659) | 27.9 (544/1950) |
| Received Abx >3 hrs T0, % (n) *b* | 13.2  (94/712) | 19.2  (10/52) | 14.0 (233/1659) | 12.6 (246/1950) |

*a* Median time in hours. *b* T0 = time of clinical suspicion of potential sepsis.

Sub-analysis Excluding Patients Who Developed Shock Within 3 Hours of ED Triage

**Supplemental Table 7:** Development Site ED Stratification, Mortality, and Antibiotic Timing Among Patients Treated with Suspected Sepsis Infection Between Jan 2016 and Dec 2023. Patients who develop shock within 3 hours of triage are excluded from this analysis.

| **Variables** | **Group 1 Shock Likely to Develop and Sepsis Probable**  **(n=2558)** | **Group 2**  **Shock Likely to Develop and Sepsis Possible**  **(n=94)** | **Group 3**  **Shock Unlikely to Develop and Sepsis Probable**  **(n=14430)** | **Group 4**  **Shock Unlikely to Develop and Sepsis Possible**  **(n=11174)** |
| --- | --- | --- | --- | --- |
| **Patient Characteristics** | | | | |
| Age Yrs [IQR] | 67 [55 - 79] | 67 [49 - 78] | 59 [42 - 72] | 55 [37 - 71] |
| Female % (n) | 43.6 (229/525) | 28.3  (13/46) | 43.7 (712/1630) | 47.6 (924/1942) |
| Black Race % (n) | 1.3  (7/525) | 4.3  (2/46) | 2.3  (38/1630) | 3.5  (68/1942) |
| White Race % (n) | 42.7 (224/525) | 43.5  (20/46) | 45.0 (734/1630) | 45.9 (891/1942) |
| Asian Race % (n) | 24.6 (129/525) | 30.4  (14/46) | 20.2 (330/1630) | 17.7 (343/1942) |
| Charlson Comorbidity Index [IQR] | 1 [0 - 3] | 0 [0 - 2] | 1 [0 - 3] | 1 [0 - 2] |
| SOFA [IQR] | 2 [1 - 4] | 2 [1 - 4] | 1 [0 - 2] | 0 [0 - 1] |
| Confirmed Sepsis*a*, % (n) | 62.3 (1593/2558) | 46.8  (44/94) | 34.5 (4976/14430) | 14.2 (1588/11174) |
| Developed Shock, % (n) | 20.3 (518/2558) | 16.0  (15/94) | 3.8 (544/14430) | 1.0 (115/11174) |
| **Antibiotic Timing** | | | | |
| Received Abx, Anytime % (n) | 93.6 (2395/2558) | 86.2 (81/94) | 87.1 (12573/14430) | 75.6 (8446/11174) |
| Time to Abx from triage [IQR]*b* | 1.8 [1.0 - 3.4] | 3.2 [1.8 - 7.0] | 2.8 [1.5 - 5.1] | 4.6 [2.7 - 8.0] |
| Time to Abx from T0 [IQR] *b,c* | 1.1 [0.6 - 2.1] | 1.7 [0.6 - 4.8] | 1.2 [0.6 - 2.5] | 1.0 [0.5 - 2.8] |
| Received Abx <1 hr triage, % (n) | 21.9 (560/2558) | 6.4  (6/94) | 12.1 (1744/14430) | 3.5 (395/11174) |
| Received Abx 1-3 hrs triage, % (n) | 44.1 (1128/2558) | 31.9  (30/94) | 34.7 (5007/14430) | 18.5 (2062/11174) |
| Received Abx >3 hrs triage, % (n) | 27.6 (707/2558) | 47.9  (45/94) | 40.3 (5822/14430) | 53.6 (5989/11174) |
| Received Abx <1 hr T0, % (n) *b* | 44.3 (1134/2558) | 35.1  (33/94) | 39.0 (5634/14430) | 37.0 (4136/11174) |
| Received Abx 1-3 hrs T0, % (n) *b* | 34.6 (885/2558) | 20.2  (19/94) | 30.4 (4391/14430) | 20.5 (2293/11174) |
| Received Abx >3 hrs T0, % (n) *b* | 14.7 (376/2558) | 30.9  (29/94) | 17.7 (2548/14430) | 18.1 (2017/11174) |
| **Short term Mortality*d*** | | | | |
| Overall, % (n) | 18.1 (463/2558) | 13.8  (13/94) | 4.7 (673/14430) | 1.8 (206/11174) |
| Received Abx <1 hr triage, % (n) | 21.4 (120/560) | 33.3  (2/6) | 5.4  (94/1744) | 5.1  (20/395) |
| Received Abx 1-3 hrs triage, % (n) | 18.7 (211/1128) | 16.7  (5/30) | 5.0 (251/5007) | 2.4 (49/2062) |
| Received Abx >3 hrs triage, % (n) | 18.7 (132/707) | 13.3  (6/45) | 5.6 (328/5822) | 2.3 (137/5989) |
| Received Abx <1 hr T0, % (n) | 20.8 (236/1134) | 21.2  (7/33) | 5.0 (279/5634) | 1.6 (68/4136) |
| Received Abx 1-3 hrs T0, % (n) | 18.5 (164/885) | 10.5  (2/19) | 5.4 (237/4391) | 2.6 (60/2293) |
| Received Abx >3 hrs T0, % (n) | 16.8  (63/376) | 13.8  (4/29) | 6.2 (157/2548) | 3.9 (78/2017) |

*a* Patients who met Sepsis 3 criteria during hospitalization. *b* Median time in hours. *c* T0 = time of clinical suspicion of potential sepsis. *d* Composite of in-hospital mortality and discharge to hospice. Hr(s), hours. SOFA, sequential organ failure assessment. Abx, antibiotics

**Supplemental Table 8:** Repeat of Validation Site ED Stratification, Mortality, and Antibiotic Timing Among Patients Treated with Suspected Sepsis Infection Between Jan 2023 and Oct 2024. Patients who develop shock within 3 hours of triage are excluded from this analysis.

| **Variables** | **Group 1**  **Shock Likely to Develop and Sepsis Probable**  **(n=525)** | **Group 2**  **Shock Likely to Develop and Sepsis Possible**  **(n=46)** | **Group 3**  **Shock Unlikely to Develop and Sepsis Probable**  **(n=1630)** | **Group 4**  **Shock Unlikely to Develop and Sepsis Possible**  **(n=1942)** |
| --- | --- | --- | --- | --- |
| **Patient Characteristics** | | | | |
| Age Yrs [IQR] | 67 [55 - 79] | 67 [49 - 78] | 59 [42 - 72] | 55 [37 - 71] |
| Female % (n) | 43.6 (229/525) | 28.3  (13/46) | 43.7 (712/1630) | 47.6 (924/1942) |
| Black Race % (n) | 1.3  (7/525) | 4.3  (2/46) | 2.3  (38/1630) | 3.5  (68/1942) |
| White Race % (n) | 42.7 (224/525) | 43.5  (20/46) | 45.0 (734/1630) | 45.9 (891/1942) |
| Asian Race % (n) | 24.6 (129/525) | 30.4  (14/46) | 20.2 (330/1630) | 17.7 (343/1942) |
| Charlson Comorbidity Index [IQR] | 1 [0 - 3] | 0 [0 - 2] | 1 [0 - 3] | 1 [0 - 2] |
| SOFA [IQR] | 2 [1 - 4] | 2 [1 - 4] | 1 [0 - 2] | 0 [0 - 1] |
| Confirmed Sepsis*a*, % (n) | 60.8 (319/525) | 34.8  (16/46) | 33.3 (543/1630) | 12.5 (243/1942) |
| Developed Shock, % (n) | 14.7  (77/525) | 8.7  (4/46) | 3.4  (56/1630) | 0.8  (16/1942) |
| **Antibiotic Timing** | | | | |
| Received Abx, Anytime % (n) | 93.1 (489/525) | 91.3  (42/46) | 93.9 (1530/1630) | 88.6 (1721/1942) |
| Time to Abx from triage [IQR]*b* | 2.1 [1.0 - 3.6] | 3.5 [1.5 - 7.1] | 3.6 [1.8 - 6.9] | 6.0 [3.1 - 9.4] |
| Time to Abx from T0 [IQR] *b,c* | 1.1 [0.6 - 2.0] | 0.9 [0.5 - 2.6] | 1.0 [0.5 - 2.1] | 0.9 [0.5 - 1.8] |
| Received Abx <1 hr triage, % (n) | 22.5 (118/525) | 10.9  (5/46) | 12.1 (198/1630) | 7.1 (137/1942) |
| Received Abx 1-3 hrs triage, % (n) | 39.6 (208/525) | 30.4  (14/46) | 27.6 (450/1630) | 14.4 (279/1942) |
| Received Abx >3 hrs triage, % (n) | 31.0 (163/525) | 50.0  (23/46) | 54.1 (882/1630) | 67.2 (1305/1942) |
| Received Abx <1 hr T0, % (n) *b* | 42.3 (222/525) | 50.0  (23/46) | 45.3 (739/1630) | 48.0 (932/1942) |
| Received Abx 1-3 hrs T0, % (n) *b* | 36.4 (191/525) | 21.7  (10/46) | 34.4 (560/1630) | 28.0 (543/1942) |
| Received Abx >3 hrs T0, % (n) *b* | 14.5  (76/525) | 19.6  (9/46) | 14.2 (231/1630) | 12.7 (246/1942) |
| **Short term Mortality*d*** | | | | |
| Overall, % (n) | 24.2 (127/525) | 8.7  (4/46) | 7.9 (128/1630) | 2.8  (54/1942) |
| Received Abx <1 hr triage, % (n) | 30.5  (36/118) | 0.0  (0/5) | 7.1  (14/198) | 5.8  (8/137) |
| Received Abx 1-3 hrs triage, % (n) | 26.4  (55/208) | 7.1  (1/14) | 7.6  (34/450) | 4.3  (12/279) |
| Received Abx >3 hrs triage, % (n) | 22.1  (36/163) | 13.0  (3/23) | 9.1  (80/882) | 2.6  (34/1305) |
| Received Abx <1 hr T0, % (n) | 27.9  (62/222) | 13.0  (3/23) | 6.9  (51/739) | 2.4  (22/932) |
| Received Abx 1-3 hrs T0, % (n) | 26.2  (50/191) | 0.0  (0/10) | 7.1  (40/560) | 4.1  (22/543) |
| Received Abx >3 hrs T0, % (n) | 19.7  (15/76) | 11.1  (1/9) | 16.0  (37/231) | 4.1  (10/246) |

*a* Patients who met Sepsis 3 criteria during hospitalization. *b* Median time in hours. *c* T0 = time of clinical suspicion of potential sepsis. *d* Composite of in-hospital mortality and discharge to hospice. Hr(s), hours. SOFA, sequential organ failure assessment. Abx, antibiotics

Statistical Comparisons of Short-Term Mortality Rates and Time to Antibiotics Distributions Between Risk Groups:

We applied Shapiro-Wilk and Kolmogorov-Smirnov tests to the time to antibiotics distributions for each risk group at each institution and found that they are all non-normal with p < 0.001 (Supplementary Tables 9-12). We then applied Kruskal-Wallis tests to compare the time to antibiotics distributions of the groups within each institution and found that they are not identical with p < 0.001 (Supplementary Table 13).

A Chi-Square test for independence was performed to determine whether short-term mortality rates significantly differed among the four risk groups. The results showed a statistically significant difference (p < 0.001), indicating that at least one group's short-term mortality rate differed from the others (Supplementary Table 14). To identify which specific groups had significant differences, we conducted pairwise Chi-Square post-hoc tests with Bonferroni correction to control for multiple comparisons (Supplementary Tables 15-18). These post-hoc tests revealed that nearly all risk groups did. We found that in some cases the short-term mortality rate of the shock likely to develop and sepsis possible group was not significantly different from some of the other risk groups, likely due to the small size of this group.

We then analyzed the distributions of the time to antibiotics administration from ED triage using a Kruskal-Wallis test. The test yielded a significant result (p < 0.001). To further investigate further which groups had significantly different time-to-antibiotic distributions, we conducted Dunn’s post-hoc pairwise comparisons with Bonferroni correction (Supplementary Tables 19-22). The results indicated that most groups had pairwise significantly different distributions. We found that the time to antibiotics distribution for the shock likely to develop and sepsis possible group was sometimes not significantly different from those in some of the other risk groups.

**Supplemental Table 9**: Normality Test of the Time to Antibiotics Distributions at the Development Site

| Group | Shapiro-Wilk p-value | Kolmogorov-Smirnov p-value | Is Normal? |
| --- | --- | --- | --- |
| Shock Likely to Develop and Sepsis Probable | 0 | 0 | FALSE |
| Shock Likely to Develop and Sepsis Possible | 5.93E-22 | 7.30E-17 | FALSE |
| Shock Unlikely to Develop and Sepsis Probable | 0 | 0 | FALSE |
| Shock Unlikely to Develop and Sepsis Possible | 0 | 0 | FALSE |

**Supplemental Table 10:** Normality Test of the Time to Antibiotics Distributions at the Validation Site

| Group | Shapiro-Wilk p-value | Kolmogorov-Smirnov p-value | Is Normal? |
| --- | --- | --- | --- |
| Shock Likely to Develop and Sepsis Probable | 1.43E-41 | 1.63E-70 | FALSE |
| Shock Likely to Develop and Sepsis Possible | 6.77E-11 | 0.0000535 | FALSE |
| Shock Unlikely to Develop and Sepsis Probable | 0 | 3.04E-167 | FALSE |
| Shock Unlikely to Develop and Sepsis Possible | 0 | 1.31E-164 | FALSE |

**Supplemental Table 11:** Normality Test of the Time to Antibiotics Distributions at the Development Site (Excluding Patients Who Develop Shock Within 3 Hours of ED Triage)

| Group | Shapiro-Wilk p-value | Kolmogorov-Smirnov p-value | Is Normal? |
| --- | --- | --- | --- |
| Shock Likely to Develop and Sepsis Probable | 0 | 0 | FALSE |
| Shock Likely to Develop and Sepsis Possible | 1.27E-18 | 2.06E-12 | FALSE |
| Shock Unlikely to Develop and Sepsis Probable | 0 | 0 | FALSE |
| Shock Unlikely to Develop and Sepsis Possible | 0 | 0 | FALSE |

**Supplemental Table 12:** Normality Test of the Time to Antibiotics Distributions at the Validation Site (Excluding Patients Who Develop Shock Within 3 Hours of ED Triage)

| Group | Shapiro-Wilk p-value | Kolmogorov-Smirnov p-value | Is Normal? |
| --- | --- | --- | --- |
| Shock Likely to Develop and Sepsis Probable | 1.43E-41 | 1.63E-70 | FALSE |
| Shock Likely to Develop and Sepsis Possible | 6.77E-11 | 0.0000535 | FALSE |
| Shock Unlikely to Develop and Sepsis Probable | 0 | 3.04E-167 | FALSE |
| Shock Unlikely to Develop and Sepsis Possible | 0 | 1.31E-164 | FALSE |

**Supplemental Table 13:** Kruskal-Wallace Tests on Time to Antibiotics Distributions of the 4 Risk Groups

| Site | Statistic | P-Value | Conclusion |
| --- | --- | --- | --- |
| Development | 2870 | 0 | At least one group is significantly different |
| Validation | 523 | 5.13E-113 | At least one group is significantly different |
| Development*** | 2210 | 0 | At least one group is significantly different |
| Validation*** | 392 | 1.24E-84 | At least one group is significantly different |

* Excluding Patients Who Develop Shock Within 3 Hours of ED Triage

**Supplemental Table 14:** Chi-Squared Tests on the Short-Term Mortality Rates of the 4 risk groups

| Site | Statistic | P-Value | Conclusion |
| --- | --- | --- | --- |
| Development | 2240 | 0 | At least one group is significantly different |
| Validation | 411 | 7.21E-89 | At least one group is significantly different |
| Development*** | 1220 | 1.01E-264 | At least one group is significantly different |
| Validation*** | 272 | 1.32E-58 | At least one group is significantly different |

* Excluding Patients Who Develop Shock Within 3 Hours of ED Triage

**Supplemental Table 15:** Pairwise Chi-Square post-hoc tests with Bonferroni correction on the Short-Term Mortality Rates at the Development Site

| Group A | Group B | P-Value (Unadjusted) | P-Value (Bonferroni Corrected) | Conclusion |
| --- | --- | --- | --- | --- |
| Shock Likely to Develop and Sepsis Probable | Shock Likely to Develop and Sepsis Possible | 0.194 | 1 | Not Significantly Different |
| Shock Likely to Develop and Sepsis Probable | Shock Unlikely to Develop and Sepsis Probable | 4.28E-267 | 2.57E-266 | Significantly Different |
| Shock Likely to Develop and Sepsis Probable | Shock Unlikely to Develop and Sepsis Possible | 0 | 0 | Significantly Different |
| Shock Likely to Develop and Sepsis Possible | Shock Unlikely to Develop and Sepsis Probable | 6.01E-10 | 0.0000000036 | Significantly Different |
| Shock Likely to Develop and Sepsis Possible | Shock Unlikely to Develop and Sepsis Possible | 9.24E-33 | 5.54E-32 | Significantly Different |
| Shock Unlikely to Develop and Sepsis Probable | Shock Unlikely to Develop and Sepsis Possible | 2.47E-39 | 1.48E-38 | Significantly Different |

**Supplemental Table 16:** Pairwise Chi-Square Post-Hoc tests with Bonferroni Correction on the Short-Term Mortality Rates at the Validation Site

| Group A | Group B | P-Value (Unadjusted) | P-Value (Bonferroni Corrected) | Conclusion |
| --- | --- | --- | --- | --- |
| Shock Likely to Develop and Sepsis Probable | Shock Likely to Develop and Sepsis Possible | 0.0597 | 0.358 | Not Significantly Different |
| Shock Likely to Develop and Sepsis Probable | Shock Unlikely to Develop and Sepsis Probable | 1.05E-37 | 6.32E-37 | Significantly Different |
| Shock Likely to Develop and Sepsis Probable | Shock Unlikely to Develop and Sepsis Possible | 1.25E-85 | 7.49E-85 | Significantly Different |
| Shock Likely to Develop and Sepsis Possible | Shock Unlikely to Develop and Sepsis Probable | 0.118 | 0.707 | Not Significantly Different |
| Shock Likely to Develop and Sepsis Possible | Shock Unlikely to Develop and Sepsis Possible | 0.00000408 | 0.0000245 | Significantly Different |
| Shock Unlikely to Develop and Sepsis Probable | Shock Unlikely to Develop and Sepsis Possible | 2.42E-12 | 1.45E-11 | Significantly Different |

**Supplemental Table 17:** Pairwise Chi-Square Post-Hoc tests with Bonferroni Correction on the Short-Term Mortality Rates at the Development Site (Excluding Patients Who Develop Shock Within 3 Hours of ED Triage)

| Group A | Group B | P-Value (Unadjusted) | P-Value (Bonferroni Corrected) | Conclusion |
| --- | --- | --- | --- | --- |
| Shock Likely to Develop and Sepsis Probable | Shock Likely to Develop and Sepsis Possible | 0.356 | 1 | Not Significantly Different |
| Shock Likely to Develop and Sepsis Probable | Shock Unlikely to Develop and Sepsis Probable | 2.91E-138 | 1.74E-137 | Significantly Different |
| Shock Likely to Develop and Sepsis Probable | Shock Unlikely to Develop and Sepsis Possible | 2.43E-259 | 1.46E-258 | Significantly Different |
| Shock Likely to Develop and Sepsis Possible | Shock Unlikely to Develop and Sepsis Probable | 0.0000844 | 0.000506 | Significantly Different |
| Shock Likely to Develop and Sepsis Possible | Shock Unlikely to Develop and Sepsis Possible | 1.17E-15 | 7.01E-15 | Significantly Different |
| Shock Unlikely to Develop and Sepsis Probable | Shock Unlikely to Develop and Sepsis Possible | 1.53E-34 | 9.18E-34 | Significantly Different |

**Supplemental Table 18:** Pairwise Chi-Square Post-Hoc Tests with Bonferroni correction on the Short-Term Mortality Rates at the Validation Site (Excluding Patients Who Develop Shock Within 3 Hours of ED Triage)

| Group A | Group B | P-Value (Unadjusted) | P-Value (Bonferroni Corrected) | Conclusion |
| --- | --- | --- | --- | --- |
| Shock Likely to Develop and Sepsis Probable | Shock Likely to Develop and Sepsis Possible | 0.0268 | 0.161 | Not Significantly Different |
| Shock Likely to Develop and Sepsis Probable | Shock Unlikely to Develop and Sepsis Probable | 1.50E-23 | 8.97E-23 | Significantly Different |
| Shock Likely to Develop and Sepsis Probable | Shock Unlikely to Develop and Sepsis Possible | 7.17E-62 | 4.30E-61 | Significantly Different |
| Shock Likely to Develop and Sepsis Possible | Shock Unlikely to Develop and Sepsis Probable | 1 | 1 | Not Significantly Different |
| Shock Likely to Develop and Sepsis Possible | Shock Unlikely to Develop and Sepsis Possible | 0.0558 | 0.335 | Not Significantly Different |
| Shock Unlikely to Develop and Sepsis Probable | Shock Unlikely to Develop and Sepsis Possible | 1.12E-11 | 6.73E-11 | Significantly Different |

**Supplemental Table 19:** Dunn’s Post-Hoc Pairwise Comparisons with Bonferroni Correction on the Time to Antibiotics Distributions at the Development Site

| Group A | Group B | P-Value (Bonferroni Corrected) | Conclusion |
| --- | --- | --- | --- |
| Shock Likely to Develop and Sepsis Possible | Shock Likely to Develop and Sepsis Probable | 0.00000000438 | Significantly Different |
| Shock Likely to Develop and Sepsis Possible | Shock Unlikely to Develop and Sepsis Possible | 0.000125 | Significantly Different |
| Shock Likely to Develop and Sepsis Possible | Shock Unlikely to Develop and Sepsis Probable | 0.931 | Not Significantly Different |
| Shock Likely to Develop and Sepsis Probable | Shock Unlikely to Develop and Sepsis Possible | 0 | Significantly Different |
| Shock Likely to Develop and Sepsis Probable | Shock Unlikely to Develop and Sepsis Probable | 9.75E-127 | Significantly Different |
| Shock Unlikely to Develop and Sepsis Possible | Shock Unlikely to Develop and Sepsis Probable | 0 | Significantly Different |

**Supplemental Table 20:** Dunn’s Post-Hoc Pairwise Comparisons with Bonferroni Correction on the Time to Antibiotics Distributions at the Validation Site

| Group A | Group B | P-Value (Bonferroni Corrected) | Conclusion |
| --- | --- | --- | --- |
| Shock Likely to Develop and Sepsis Possible | Shock Likely to Develop and Sepsis Probable | 0.0105 | Significantly Different |
| Shock Likely to Develop and Sepsis Possible | Shock Unlikely to Develop and Sepsis Possible | 0.00122 | Significantly Different |
| Shock Likely to Develop and Sepsis Possible | Shock Unlikely to Develop and Sepsis Probable | 1 | Not Significantly Different |
| Shock Likely to Develop and Sepsis Probable | Shock Unlikely to Develop and Sepsis Possible | 2.68E-109 | Significantly Different |
| Shock Likely to Develop and Sepsis Probable | Shock Unlikely to Develop and Sepsis Probable | 4.61E-34 | Significantly Different |
| Shock Unlikely to Develop and Sepsis Possible | Shock Unlikely to Develop and Sepsis Probable | 2.88E-36 | Significantly Different |

**Supplemental Table 21:** Dunn’s Post-Hoc Pairwise Comparisons with Bonferroni Correction on the Time to Antibiotics Distributions at the Development Site (Excluding Patients Who Develop Shock Within 3 Hours of ED Triage)

| Group A | Group B | P-Value (Bonferroni Corrected) | Conclusion |
| --- | --- | --- | --- |
| Shock Likely to Develop and Sepsis Possible | Shock Likely to Develop and Sepsis Probable | 0.000000191 | Significantly Different |
| Shock Likely to Develop and Sepsis Possible | Shock Unlikely to Develop and Sepsis Possible | 0.0621 | Not Significantly Different |
| Shock Likely to Develop and Sepsis Possible | Shock Unlikely to Develop and Sepsis Probable | 0.147 | Not Significantly Different |
| Shock Likely to Develop and Sepsis Probable | Shock Unlikely to Develop and Sepsis Possible | 0 | Significantly Different |
| Shock Likely to Develop and Sepsis Probable | Shock Unlikely to Develop and Sepsis Probable | 2.30E-62 | Significantly Different |
| Shock Unlikely to Develop and Sepsis Possible | Shock Unlikely to Develop and Sepsis Probable | 0 | Significantly Different |

**Supplemental Table 22:** Dunn’s Post-Hoc Pairwise Comparisons with Bonferroni Correction on the Time to Antibiotics Distributions at the Validation Site (Excluding Patients Who Develop Shock Within 3 Hours of ED Triage)

| Group A | Group B | P-Value (Bonferroni Corrected) | Conclusion |
| --- | --- | --- | --- |
| Shock Likely to Develop and Sepsis Possible | Shock Likely to Develop and Sepsis Probable | 0.019 | Significantly Different |
| Shock Likely to Develop and Sepsis Possible | Shock Unlikely to Develop and Sepsis Possible | 0.0149 | Significantly Different |
| Shock Likely to Develop and Sepsis Possible | Shock Unlikely to Develop and Sepsis Probable | 1 | Not Significantly Different |
| Shock Likely to Develop and Sepsis Probable | Shock Unlikely to Develop and Sepsis Possible | 1.88E-75 | Significantly Different |
| Shock Likely to Develop and Sepsis Probable | Shock Unlikely to Develop and Sepsis Probable | 1.85E-21 | Significantly Different |
| Shock Unlikely to Develop and Sepsis Possible | Shock Unlikely to Develop and Sepsis Probable | 1.10E-35 | Significantly Different |
